1                    Effects of date fruit (*Phoenix dactylifera*) on sperm cell  
2 morphology and reproductive hormonal profiles in cypermethrin-  
3 induced male infertility

4  
5  
6                    Ubah Simon Azubuiké<sup>1</sup>, Agbonu Oluwa Adikpe<sup>2</sup>, Columbus Philemon Kwinjoh<sup>1</sup>,  
7 Abah Kenneth Owoicho<sup>1</sup>, Chibuogwu Ijeoma Chika<sup>1</sup>, Abalaka Samson Enejo<sup>3</sup>, Abayomi Samuel  
8 Bankole<sup>4</sup>, Enem Simon Ikechukwu<sup>5</sup> and Ajayi Itopa Etudaye<sup>6, 7 \*</sup>

9  
10  
11                    <sup>1</sup>Department of Theriogenology, University of Abuja, Nigeria

12                    <sup>2</sup>Department of Veterinary Physiology and Biochemistry, University of Abuja, Nigeria

13                    <sup>3</sup>Department of Veterinary Pathology, University of Abuja, Nigeria

14                    <sup>4</sup>National Open University of Nigeria, Faculty of Agricultural Sciences, Abuja, Nigeria

15                    <sup>5</sup>Department of Veterinary Public Health, University of Abuja, Nigeria

16                    <sup>6</sup>Department of Veterinary Anatomy, University of Abuja, Nigeria

17                    <sup>7</sup>National Open University of Nigeria, Faculty of Health Sciences, Abuja, Nigeria

18  
19  
20  
21  
22  
23  
24  
25                    **Short title:**

26                    Effects of date fruits on male fertility

27  
28  
29  
30  
31  
32  
33  
34                    \*For correspondence: **Dr. Itopa Ajayi**, DVM, PhD

35                    Department of Veterinary Anatomy, University of Abuja, Nigeria

36                    E-mail: [mailitopa@gmail.com](mailto:mailitopa@gmail.com); Phone: +234 7 04343 3344

## 40 **Abstract**

41 Date fruits are endowed with medicinal values, including boosting the male fertility status, but with  
42 meagre empirical evidence. Thus, the current study was designed to assess the ameliorative and  
43 potential adverse effects of date fruit extracts (*Phoenix dactylifera*) on cypermethrin-induced male  
44 infertility. The study was conducted in two phases using adult male Wistar rats (n = 42, 180 – 220  
45 g and aged 14 - 16 weeks). The first phase was a single oral dose toxicity study to ascertain the  
46 suitability of date fruit extract and cypermethrin administered at 250 mg/kg and 60 mg/kg,  
47 respectively. The second phase, which included four treatment groups of six animals per group,  
48 assessed the effects of date fruits on cypermethrin-induced infertility. At the termination of the  
49 experiment, semen was collected by epididymal extraction for the assessment of sperm  
50 abnormalities, motility, mass activity, semen pH, and percentage live. Serum samples were also  
51 collected for testosterone and follicle stimulating hormone (FSH) profiling, and the collected data  
52 was subjected to statistical analysis. The group administered only cypermethrin showed a decrease  
53 in percentage motility, live, mass activity and an increase in total abnormalities over the control  
54 group while the group exposed to only date fruits extracts showed increased percentage motility,  
55 live, mass activity and a decrease in total abnormalities over the control. The results of a combined  
56 administration of date fruit extracts and cypermethrin on a separate group showed a consistently  
57 reduced percentage of anatomically abnormal sperm cells and a general improvement of sperm  
58 motility and mass activity. There was no significant difference in the weight of the Wistar rats in all  
59 the groups ( $p > 0.05$ ). However, testosterone and FSH levels were significantly reduced ( $p < 0.05$ )  
60 by date fruit extract treatment. The current report provides evidence of the potential ameliorative  
61 effects of date fruit extracts in cypermethrin-induced male infertility and cautions excessive use or  
62 abuse since some adverse effects were observed.

63 **Key Words:** Semen, Testosterone, FSH, date fruit, Cypermethrin, Infertility

64

## 65 **1.0. Introduction**

66 Cypermethrin is a neurotoxic synthetic pyrethroid that is commonly used as a synergist to increase  
67 the potency of insecticides on pests [1]. Sequel to a recommendation by the World Health  
68 Organisation (WHO), the use of the chemical has become popular for the effective treatment of  
69 mosquitoes in Asia and Africa [2], where malaria is epidemic [3]. However, studies have reported  
70 cases of acquired infertility following exposure of cypermethrin to animals [4 - 8]. The lethal dose  
71 (LD<sub>50</sub>) of cypermethrin in rats following oral administration is 251 mg/kg of body weight [9], but  
72 periodic subacute doses over prolonged periods result in chronic genotoxic effects including a  
73 significant reduction in the relative weights of the testes, epididymis, seminal vesicle and prostate  
74 glands that, consequently, disrupts the normal androgen status and androgenesis [10 - 13]. Thus,  
75 irrespective of the value of cypermethrin in agriculture, the residues, in trace amounts or higher  
76 levels, in the air, soil and water, are toxic to mammals.

77

78 However, there are indications that date fruits, *Phoenix dactylifera*, possesses some ameliorative  
79 effects over cypermethrin-induced infertility, but these theories have not been scientifically  
80 validated. *Phoenix dactylifera* is a monocotyledon that belongs to the family of Arecaceae. The  
81 plant and its fruits hold high economic values in the tropical and desert areas of Africa, the Middle  
82 East and Asia [14], and are endowed with several medicinal values [15]. For instance, it enhances  
83 the relief of oxidative stress by neutralizing free radicals and decomposing peroxidases [16].  
84 Interestingly, studies have demonstrated a strong correlation between cypermethrin exposure and  
85 the production of excess reactive oxygen species (ROS). An excessive production of ROS is a

86 known cause of oxidative stress [17] that induces organ injury by the oxidative damage of  
87 deoxyribonucleic acid (DNA), proteins and lipids [18]. Juxtaposing these reports with the  
88 antioxidant properties of *Phoenix dactylifera* suggests that date fruits could possess an ameliorative  
89 influence over the pathophysiologic effects generated through chronic exposure to cypermethrin.  
90 Furthermore, date fruit extracts contain estrogenic materials such as gonad-stimulating compounds  
91 that enhance male fertility [19 - 23]. This information partly validates the tradition of eating date  
92 fruits as a fresh vegetable to boost male fertility. Together, these factors bear significance in  
93 traditional African medicine and culture, and so preparations of date fruits are often administered  
94 as oral suspensions to cure male infertility with varying degrees of successes. However, in the  
95 literature, there is scanty empirical evidence of the protective effects of date fruit on sperm  
96 parameters. Moreover, being an exogenous source of steroid with a capacity to up-regulate  
97 spermatogenesis [24], the extracts of date fruits may also disrupt normal hormonal processes. Yet,  
98 there is no evidence of the potential adverse effects of *Phoenix dactylifera* on the male reproductive  
99 system.

100

101 Therefore, the current study aimed to evaluate the therapeutic and potential adverse effects of date  
102 fruit extract on semen picture, FSH and testosterone profiles following cypermethrin-induced  
103 toxicity.

104

105

106

107

108

## 109 **2.0. Materials and methods**

### 110 **2.1. Experimental animals and study area**

111 The University of Abuja Institutional Animal Ethics Committee, Nigeria, approved the experiments  
112 conducted in the current study. The care and use of animals were also guided by the standard  
113 principles of laboratory animal care. Male Wister rats (n = 42; 180 – 220 g and aged 14 - 16 weeks)  
114 were used for the study. The animals were acclimated to the study environment for 3 weeks prior  
115 to the commencement of the experiments. Standard plastic cages were used to house the animals  
116 and these were placed under 12:12 hour light: dark cycle. Food and water were provided *ad libitum*.

### 117 **2.2. Plant identification, extraction and standardization**

118 Date fruits were obtained from Shuwari, Dutse LGA, Jigawa State, Nigeria  
119 (11°42'04"N 9°20'31"E). The plant was identified at the Herbarium Centre of the University of  
120 Abuja, Nigeria, with herbarium number UNIBUJA/H/70. Debris was separated from the selected  
121 date fruits and then the fruits were allowed to air dry for a period of two weeks. The seeds were then  
122 removed from the pods and macerated using a laboratory blender (Conair™ 7011S). One kilogram  
123 of the sample was weighed using a weighing balance and then poured into a 3-Litre beaker  
124 containing 2.5 L of methanol. The preparation was then left to stand at room temperature for 72  
125 hours after which a musling cloth was used to filter out the extract from the shaft. The extract was  
126 concentrated on a water bath until dried. The percentage yield was calculated and recorded as 35 %.

127 A phytochemical analysis of the extract was done using a UV visible double beam  
128 spectrophotometer (Cecil 750, Cambridge England®).

129

130

## 131 **2.3. Experimental design**

132 The experiments in the current study were divided into two phases. The first phase was a single oral  
133 dose toxicity study while the second phase examined the effects of date fruit extracts on  
134 cypermethrin-induced male infertility.

135

### 136 **2.3.1. Single oral dose toxicity study**

137 This phase of the experiment was conducted to ascertain the suitability of the selected doses of  
138 cypermethrin and date fruits to be used in the current experiment. The dose of cypermethrin used in  
139 this phase of the study was selected as a fraction of the oral LD<sub>50</sub> dose for rats [9]. Following a two-  
140 week period of acclimatisation, Wister rats (n = 18) were divided into three groups of 6 animals  
141 each designated as A, B and C. Group A served as control and was administered distilled water. The  
142 test rats (Groups B and C) were fasted for 4 hours with free access to water only. Group B was  
143 administered date fruit extract orally at a dosage of 250 mg/kg of body weight and Group C was  
144 administered cypermethrin at a dosage of 60 mg/kg of body weight. Rats were observed for signs  
145 of acute toxicity including, behavioral changes and mortality for 14 days.

146

### 147 **2.3.2. Effects of date fruit extracts on cypermethrin-induced male infertility**

148 The experimental setup for this phase comprised of four treatment groups of six animals each:  
149 Animals in Group 1 (The control group) were administered distilled water. Animals in Group 2 were  
150 administered cypermethrin at a dose of 60 mg/kg. Animals in Group 3 were administered a  
151 combination of cypermethrin and date fruit extracts at the dose rates of 60 mg/kg and 250 mg/kg,  
152 respectively. In Group 4, animals were administered date fruit extract at a dose of 250 mg/kg. All  
153 the preparations were orally administered weekly for a period of eight weeks using the Gavage

154 method [25]. At the termination of the experiment, the rats were euthanised and semen was  
155 collected.

156

## 157 **2.4. Semen collection and evaluation**

158 Semen collection was done by epididymal extraction [26] for the assessment of sperm motility, mass  
159 activity, semen pH, percentage live and abnormalities. Serum samples were also collected for  
160 testosterone and FSH assay. A descriptive summary of epididymal extraction, according to Turner  
161 and Giles, 1982 [26] is as follows: The rats were euthanised with an over dose of anesthetic ether  
162 (Nandkrishna Chemicals). The testes were then exteriorized by incising the scrotum, and the  
163 testicles were extracted as the *tunica vaginalis* was opened. The caudal epididymis was then isolated  
164 and cleaned with warm normal saline at 37 °C, and punctured with a sterile needle to ‘milk-out’  
165 semen. The semen was evaluated according to a method described by Zemjanis [27]. Briefly, a drop  
166 of semen was extracted onto a pre-warm glass slide. An approximately equal drop of normal saline  
167 was immediately added to dilute the semen. The semen sample was then cover-slipped and viewed  
168 using a field microscope at x4 magnification to determine the mass activity and x10 magnification  
169 to assess the progressive motility of each sample. Morphological abnormalities were determined by  
170 diluting a drop of semen with 4 % buffered formal saline stained with Eosin-Nigrosin stain. The  
171 slides were allowed to dry and then viewed under a light microscope to assess 100 sperm cells per  
172 animal using oil immersion for percentage live and abnormalities. Further, a drop of raw undiluted  
173 semen sample was taken and placed on a litmus paper for pH determination.

174 Photomicrographs were obtained with a light microscope (Olympus BX 53) equipped with an  
175 Olympus DP72 camera. Digital images were minimally optimised by adjusting contrast and

176 brightness using Adobe Photoshop CC (version 2017.1.1). Vector-based illustrations were made  
177 using Adobe Illustrator CC (version 2017.1.1)

178

## 179 **2.5. Serum collection and hormone assay**

180 Hormonal assay was done using the serum sample obtained from the rats. Blood samples were  
181 collected in non-heparinized tubes through the ocular media cantus after adequately anesthetizing  
182 the rats. Clear serum samples were then collected by allowing the blood to clot and centrifuging at  
183 1500 rpm (Anke® TGL-12B). The collected serum samples were stored in bottles at -20 °C until the  
184 time for analysis. Testosterone and FSH were analysed using a standard immunoassay technique,  
185 Spectra Testosterone and FSH kits (Orion Diagnostica; Finland and DRG Instruments GmbH;  
186 Germany).

187

## 188 **2.6. Statistical analysis**

189 All the data obtained were expressed as mean  $\pm$  standard error of mean (SEM). The data was  
190 analyzed using one-way analysis of variance (ANOVA) and values of  $p < 0.05$  were considered  
191 statistically significant.

192

## 193 **3.0. Results**

### 194 **3.1. Single oral dose toxicity study**

195 There was no observable sign of toxicity and mortality in groups A (distilled water) and B (date  
196 fruit extracts). However, in group C (Cypermethrin), the rats displayed signs of mild toxicity each



197 time cypermethrin was orally administered. The signs of toxicity included jumping, uncoordinated  
198 movement and restlessness within the cage, which subsided after approximately 10 minutes.

199

### 200 **3.2. Phytochemical analysis**

201 Phytochemical analysis indicated that date fruit extract contains 18.2 % alkaloids, 19.2 % tannins,  
202 14.6 % flavonoid, 17.8 % phenol and negligible quantities of glucoside.

203

### 204 **3.3. Observed anatomic defects of sperm cells**

205 The morphology of sperm cells in all the groups were assessed and the percentages of normal and  
206 abnormal cells were derived from a total of 2, 000 cells. Normal sperm cells were identified by the  
207 possession of a smooth hook-shaped head and a droplet-like structure located at the mid-piece of a  
208 sperm flagellum. Normal cells were observed in 76.4 % of the sperm cells present in the control  
209 samples (Figure 1d) while the abnormal cells constituted 23.6 %. However, in the group treated with  
210 cypermethrin alone, the total number of abnormal sperm cells increased by 2.2 % while groups 3  
211 and 4 had a significant reduction in the percentage of abnormal sperm cells (Figure 1d). Further,  
212 based on the location of the abnormality, sperm cell abnormalities were grouped into head, mid-  
213 piece and tail abnormalities. The predominant head abnormality was detached heads, which  
214 reflected as detached hook-shaped structures without the other components (mid-piece and tail) of  
215 the sperm cells. The mid-piece and tail abnormalities observed included bent mid-pieces and tails,  
216 double cytoplasmic droplets, coiled tails, dag effects and free tails (Figures 2 and 3).

217

218

219

### 220 **3.4. Sperm motility and percentage liveability**

221 Results showed that there was no significant difference in the sperm motility, percentage live, mass  
222 activity and pH for samples in all the groups ( $p > 0.05$ ) (Figure 1a - c). There was also no significant  
223 difference in the weight of Wister rats ( $p > 0.05$ ).

224

### 225 **3.5. Hormonal assay**

226 The hormonal assay showed significantly lower FSH values of  $1.75 \pm 0.97^b$  and  $2.26 \pm 1.05^b$  mIU/ml  
227 for groups 3 and 4, respectively ( $p < 0.05$ ). Testosterone profiles also showed significantly lower  
228 values of  $0.77 \pm 0.09^b$  ng/ml for group 3 ( $p < 0.05$ ) (Table 1). A summary of final testosterone and  
229 FSH profile against the reference values [28] are presented in Table 1.

230

#### 231 **Table 1: Follicle stimulating hormone (FSH) and testosterone profiles of Wister rats (n = 20)**

232 Mean ( $\pm$ SEM) Body weight, FSH and Testosterone profiles of Wister rats tested for the effect of  
233 date fruit extracts on Cypermethrin induced male impotence.

234

| <b>Groups</b> | <b>FSH (mIU/ml) *</b> | <b>Testosterone (ng/ml) **</b> |
|---------------|-----------------------|--------------------------------|
| Group 1       | $6.18 \pm 2.48^a$     | $2.00 \pm 0.51^a$              |
| Group 2       | $8.04 \pm 4.37^a$     | $1.72 \pm 0.61^a$              |
| Group 3       | $1.75 \pm 0.97^b$     | $0.77 \pm 0.09^b$              |
| Group 4       | $2.26 \pm 1.05^b$     | $1.25 \pm 0.37^a$              |

235

236

237

238

## 239 **4.0. Discussion**

240 In the current study, the capacity of cypermethrin to cause damage to the male reproductive cells  
241 and modulate the endocrinal system at a fraction of the median oral LD<sub>50</sub> [9] in rats was validated  
242 in the group of animals that were exposed to cypermethrin alone (Figure 1a and b). This finding  
243 aligns with a substantial number of studies that have identified cypermethrin as a primary cause of  
244 infertility [16, 29, 30, 31]. The authors report that chronic exposure to cypermethrin could result in  
245 cytotoxic organ damage since a microscopic assessment of sperm cells revealed a cocktail of sperm  
246 cell morphological abnormalities (Figures 2 and 3). Although the rats administered cypermethrin  
247 exhibited signs of mild toxicity, the signs lasted a short duration after which apparent health was  
248 restored indicating that the selected dose of 60 mg/kg was suitable for a more chronic experiment.  
249 The mechanisms through which cypermethrin exerts its actions includes direct damage to the male  
250 reproductive system facilitated by oxidative stress [29, 30], disruption of neurotransmission [31]  
251 and the modulation of endocrinal balance [16]. The current study did not investigate any of these  
252 mechanisms of action since the experiments focused on the protective effects of date fruit extracts.  
253 However, the novelty herein is the observation that date fruits reduces the pathologic effects  
254 observed in cypermethrin-induced infertility. Evidence to support this statement includes the  
255 observed general improvement of spermatozoa health reflected in the higher percentage of motility  
256 and liveability, and the lower sperm cell abnormalities observed when animals treated with date  
257 fruits were compared with the control values.

258

259 Infertility is a challenging global issue [32], and the current study reveals substantial evidence of  
260 the protective values of date fruits over the condition. For instance, a reduction in the incidence of  
261 anatomically abnormal sperm cells (Figure 1d) when rats were treated with date fruit extracts is a

262 scientific evidence indicating capacity to reduce the chronic cytotoxic damage of cypermethrin on  
263 the male reproductive system. The most common anatomic defect observed (mid-piece and tail  
264 abnormalities, which appeared either detached, inadequately developed, coiled or bent) can be  
265 attributed to weak or incomplete adhesion between the plasma membrane and nuclear envelope at  
266 the posterior ring of the mid-piece [33]. These defects are common during spermatogenesis and  
267 often occur at the implantation fossa of the mid-piece [34]. The defects are phenotypic reflections  
268 of gene interactions and mutation. Moreover, the defects indicate the degree of abnormality and  
269 immaturity of the sperm population in an ejaculate, which have a directly proportional relationship  
270 with the fertility status of an animal. Interestingly, the differences in the number of structurally  
271 defective sperm cells between the groups were consistent, and our findings agree with those of  
272 previous studies [35, 36], which reported that date palm pollen possess properties that improve male  
273 infertility.

274

275 Another valuable evidence that date fruit extracts reduces the impact of cypermethrin on the toxicity  
276 of sperm cells was indicated by the increased motility or mass activity observed in the current study.  
277 Increased motility could result from the antioxidant property of date fruit extracts against  
278 cypermethrin-induced oxidative stress since date fruit extract contains antioxidants such as  
279 coumaric and ferulic acids [37]. The authors suggest that similar antioxidant properties were  
280 responsible for the improved percentage liveability.

281

282 However, the adverse effects of date fruit extracts on the reproductive hormones was a cause for  
283 concern as it appeared that the extracts possess the capacity to modulate the endocrine system by  
284 significantly lowering FSH and testosterone hormonal levels below referenced values (Table 1).

285 The endocrinal mechanisms that resulted in this effect are unclear, but it is known that date fruits  
286 possess estrogenic and gonadotropic activities [21, 22], which classifies the plant as a source of  
287 exogenous steroid. So, if ingested for a prolonged period, date fruits potentially increase systemic  
288 estrogen levels, thereby triggering a negative feedback mechanism of exogenous gonadotrophin at  
289 the level of the anterior pituitary. This feedback loop consequently reduces endogenous  
290 gonadotropins including FSH, Sertoli cells levels, androgen binding proteins and testosterone levels  
291 [38]. Thus, date fruits bear potential adverse effects on fertility.

292

#### 293 **4.1. Conclusion**

294 The causes of infertility are diverse, and range from innate genetic disorders [39, 40] to several  
295 acquired factors including infection [41, 42], chemo cytotoxicity and endocrinal imbalance [43].

296 The results from the current study show that ingested date fruit extracts possess some ameliorative  
297 properties over cypermethrin-induced male infertility. Indicators of fertility such as sperm cell  
298 morphology, motility and mass activity supported the claim of an ameliorative effect. However,  
299 identifying a specific treatment regimen is difficult since the aim of an ideal strategy would require  
300 targeting the root cause of the disease, while minimizing adverse effects. Amidst the protective  
301 properties of date fruit extracts, the plant also carried some adverse effects on the fertility of the  
302 male reproductive system, as observed in the present study. The endocrinal system was modulated  
303 by a reduction in the levels of testosterone and FSH. These changes were indicative of adverse  
304 effects. Against these back-drop, it would be important for future studies to establish a dose-effect  
305 relationship. A dose-effect relationship curve is one of the criteria for determining causality, which  
306 would strengthen the inferences made in the current study. Also, investigations into the physiologic

307 mechanisms recruited by date fruit extracts (*Phoenix dactylifera*) would be crucial to fully  
308 understand the medicinal value of the plant.

309

## 310 **Acknowledgement**

311 The authors thank the staff The Sheda Science and Technology Complex (SHESTCO), Abuja, for  
312 the technical support received.

313

## 314 **Author contribution**

315 All authors contributed equally to the study.

316

## 317 **Funding**

318 No funding

319

320

321

322

323

324

325

326

327

328

329 **Figure 1: Analysis of the effects of date fruits (*Phoenix dactylifera*) on cypermethrin-induced**  
330 **male infertility (n = 24).** The parameters of infertility measured in the current study include  
331 percentage motility (A), Percentage live (B), Mass activity and pH, and percentage sperm cell  
332 abnormalities (D). The results suggest a significant level of cytotoxic activity by cypermethrin on  
333 the male reproductive system as indicated in group 2 of all the parameters measured with the  
334 exception of pH. However, there is also a significant ameliorative effect following the  
335 administration of date fruit extracts as indicated in groups 3 and 4 of all the parameters measured.

336

337 **Figure 2: Morphological abnormalities of sperm cells in cypermethrin-induced male**  
338 **infertility.** The pictures are representative photomicrographs of the observed sperm cell defects in  
339 the current study with highlighted areas that contain the sperm cell structural abnormality (red box  
340 and arrows). The observed abnormalities include (a) double cytoplasmic droplet, (b) Dag effect, (c)  
341 coiled tail, (d) detached head, (e) bent tails and (f) free tail. The assessment of the structural  
342 abnormalities was done on an overall reference population of 2,000 sperm cells. Scale bar = 20  $\mu$ m.

343

344 **Figure 3: Graphical illustrations of a normal sperm cell (a) and all the structural sperm cell**  
345 **abnormalities (b' – d') observed in the current study.** Structural abnormalities include double  
346 cytoplasmic droplets (b'), Dag effect (c'), coiled tails (d'), free tail (e'), bent tail and mid-pieces  
347 (f'), and detached head (g'). The varying percentages of these structural abnormalities in the  
348 treatment groups suggest that date fruits possess some ameliorative properties on cypermethrin-  
349 induced infertility in males.

350

351

## 352 **References**

- 353 1. Wang X-Z, Liu S-S, Sun Y, Wu J-Y, Zhou Y-L, Zhang J-H.  $\beta$ - Cypermethrin impairs  
354 reproductive function in male mice by inducing oxidative stress. *Theriogenology*, 2009; 72:  
355 599 - 611.
- 356 2. WHO. The WHO recommended classification of pesticides by hazard and guidelines to  
357 classificationcation1998Ð1999. WHO/PCS/98.21/Rev.1. World Health Organiza-tion,  
358 Geneva, Switzerland (*PDF*) *Bifenthrin: A Useful Pyrethroid Insecticide for Treatment of*  
359 *Mosquito Nets*. Available from:  
360 [https://www.researchgate.net/publication/11313832\\_Bifenthrin\\_A\\_Useful\\_Pyrethroid\\_Insec](https://www.researchgate.net/publication/11313832_Bifenthrin_A_Useful_Pyrethroid_Insecticide_for_Treatment_of_Mosquito_Nets)  
361 [ticide\\_for\\_Treatment\\_of\\_Mosquito\\_Nets](https://www.researchgate.net/publication/11313832_Bifenthrin_A_Useful_Pyrethroid_Insecticide_for_Treatment_of_Mosquito_Nets). 1998
- 362 3. Abeku TA. Response to malaria epidemics in Africa. *Emerging Infectious Diseases*, 2007;  
363 13(5): 681 – 686.
- 364 4. Elbetieha A, Da’as SI, Khamas W, Darmani H. Evaluation of the toxic potentials of  
365 cypermethrin pesticide on some reproductive and fertility parameters in the male rats. *Archives*  
366 *of Environmental Contamination and Toxicology*, 2001; 41: 522 – 528.
- 367 5. Assayed ME, Salem HA, Khalaf AA. Protective effects of garlic extract and vitamin C against  
368 Cypermethrin reproductive toxicity in male rats. *Research Journal of Veterinary Science*, 2008;  
369 1: 1 - 5.
- 370 6. Ling S, Yu-Bang W, Hong S, Chen Y, Xia H, Jian-Hua Q, Jian-wei Z, Xin-Ru W. Effects of  
371 fenvalerate and cypermethrin on rat sperm motility patterns *in vitro* as measured by computer  
372 assisted sperm analysis. *Journal of Toxicology and Environmental Health Parth A.*, 2008; 71  
373 (5): 325 - 332.



- 374 7. Hu JX, Li YF, Li J, Pan C, He Z, Dong HY, Xu LC. Toxic effects of cypermethrin on the male  
375 reproductive system: with emphasis on the androgen receptor. *Journal of Applied Toxicology*,  
376 2013; 33: 576 – 585.
- 377 8. Huang C, Li X. Maternal cypermethrin exposure during the perinatal period impairs testicular  
378 development in C57BL male offspring. *PLoS ONE* 2014; 9(5): e96781. doi:  
379 10.1371/journal.pone.0096781
- 380 9. Nagarjuna A, Doss JP. Acute oral toxicity and histopathological studies of cypermethrin in  
381 rats. *Indian Journal of Animal Research*, 2009; 43: 235.
- 382 10. Song L, Wang YB, Sun H, Yuan C, Hong X, Qu J-H, Zhou J-W, Wang X-R. Effects of  
383 fenvalerate and cypermethrin on rat sperm motility patterns in vitro as measured by computer-  
384 assisted sperm analysis. *Journal of Toxicology and Environmental Health A*, 2008; 71: 325 –  
385 332.
- 386 11. Wang H, Wang SF, Ning H, Ji YL, Zhang C, Zhang Y, Yu T, Ma XH, Wang Q, Liu P, Meng  
387 XH, Xu DX. Maternal cypermethrin exposure during lactation impairs testicular development  
388 and spermatogenesis in male mouse offspring. *Environmental Toxicology*, 2011; 26: 382 – 394.
- 389 12. Dohlman TM, Phillips PE, Madson DM, Clark CA, Gunn PJ. Effects of label dose permethrin  
390 administration in yearling beef cattle: I. Bull reproductive function and testicular  
391 histopathology. *Theriogenology*, 2016; 85: 1534 – 1539.
- 392 13. Dibal NI, Hambolu JO, Buraimoh AA. Effects of *Phoenix dactylifera* on the testes, epididymal  
393 sperm pattern and hormonal profiles of male Wistar rats. *Journal of Infertility and Reproductive*  
394 *Biology*, 2016; 4(2): 45 – 50.

- 395 14. Besbes S, Drira I, Blecker C, Deroanne C, Attia H. Adding value to hard date (*Phoenix*  
396 *dactylifera* L.): Compositional, functional and sensory characteristics of date jam. Food  
397 Chemistry, 2009; 112: 406 - 411.
- 398 15. Baliga BRV, Kandathil SM, Bhat HP, Vayalil PK. A review of the chemistry and pharmacology  
399 of the date fruits (*Phoenix dactylifera* L.). Food Research International, 2011; 44: 1812 -1822.
- 400 16. Al-Meqbaali F, Habib H, Othman A, Al-Marzooqi S, Al-Bawardi A, Pathan JY, Hilary S,  
401 Souka U, Al-Hammadi S, Ibrahim W, Platat C. The antioxidant activity of date seed:  
402 preliminary results of a preclinical in vivo study. Emirates Journal of Food and Agriculture,  
403 2017; 29 (11): 822 - 832.
- 404 17. Singh AK, Tiwari MN, Singh MP. A current review of cypermethrin-induced neurotoxicity and  
405 nigrostriatal dopaminergic neurodegeneration. Current Neuropharmacology, 2012; 10 (1): 64 –  
406 71.
- 407 18. Goetz ME, Luch A. Reactive species: a cell damaging rout assisting to chemical carcinogens.  
408 Cancer letters, 2008; 266: 73 - 83.
- 409 19. Mahran GH, Abdel-Wahab SM, Attia AM. A phytochemical study of date palm pollen. Planta  
410 Medica, 1976; 29: 171 - 175.
- 411 20. Bennet RD, Ko ST, Heftmann E. Isolation of estrone and cholesterol from the date palm  
412 *Phoenix dactylifera*. Phytochemistry, 1996; 5: 231 - 235.
- 413 21. Dostal LA, Faber CK, Zandee J. Sperm motion parameters in vas deferens and cauda  
414 epididymal rat sperm. Reproduction Toxicology, 1996; 10: 231 - 235.
- 415 22. Bajpayee KK. Ethnobotany of *Phoenix* (Archaeae). Journal of Economic and Taxonomic  
416 Botany, 1997; 21: 155 - 7.

- 417 23. Bahmanpour S, Talaei T, Vojdani Z, Panjehshahin MR, Poostpasand IA, Zareei S, Ghaemina  
418 M. Effect of *Phoenix Dactylifera* Pollen on Sperm Parameters and Reproductive system of  
419 Adult Male Rats. Iran Journal of Medical Science, 2006; 31(4): 208.
- 420 24. Miura T, Ohta T, Miura CI, Yamauchi K. Complementary deoxyribonucleic acid cloning  
421 of spermatogonial stem cell renewal factor. Endocrinology, 2003; 144: 5504 - 10.
- 422 25. Pan-Montojo FJ, Funk RH. Oral administration of rotenone using a Gavage and image analysis  
423 of alpha-synuclein inclusions in the enteric nervous system. Journal of Visualised  
424 Experiments, 2010; 44: e2123.
- 425 26. Turner T, Giles R. Sperm motility-inhibiting factor in rat epididymis. American Journal of  
426 Physiology-Regulatory, Integrative and Comparative Physiology, 1982; (242), R199 -R203.
- 427 27. Zemjanis R. Collection and evaluation of semen. In: Diagnostic and therapeutic techniques in  
428 animal reproduction. The Williams and Wilkins Company, Baltimore, 1977; pp: 139 -180.
- 429 28. Lee VWK, de Kretser DM, Hudson B, Wang C. Variations in serum FSH, LH and testosterone  
430 levels in male rats from birth to sexual maturity. Journal of Reproductive Fertility, 1975; 42:  
431 121 – 126.
- 432 29. Sharma P, Huq AU, Singh R. Cypermethrin induced reproductive toxicity in male Wister rate:  
433 protective role of *Tribulus terrestris*. Journal of Environmental Biology, 2013; 34(5): 857 – 62.
- 434 30. Zalata A, Elhanbly S, Abdalla H, Serria MS, Aziz A, El-Dakrooy SA, El-Bakary AA, Mostafa  
435 T. *In vitro* study of cypermethrin on human spermatozoa and the possible protective role of  
436 vitamins C and E. Andrologia, 2013; 46(10): 1141 – 1147.
- 437 31. Gill SA, Rizvi F, Khan A. Toxic effects of cypermethrin and methamidophos on bovine corpus  
438 luteal cells and progesterone production. Experimental Toxicology and Pathology, 2011; 63:  
439 131 – 135.

- 440 32. Agarwal A, Mulgund A, Hamada A, Chyatte MR. A unique view on male infertility around the  
441 globe. *Reproductive Biology and Endocrinology*, 2015; 13: 37.
- 442 33. Ray PF, Toure A, Metzler-Guillemain C, Mitchell MJ, Arnoult C, Coutton C. Genetic  
443 abnormalities leading to qualitative defects of sperm morphology or function. *Clinical Genetics*,  
444 2016; 91: 217 – 232.
- 445 34. Suzuki-Toyota F, Ito C, Toyama Y, Maekawa M, Yao R, Noda T, Toshimori K. The coiled  
446 tail of the round-headed spermatozoa appears during epididymal passage in *GOPC*-deficient  
447 mice. *Archives of Histology and Cytology*, 2004; 67 (4): 361 – 371.
- 448 35. Mehraban F, Jafari M, Toori MA, Sadeghi H, Joodi B, Mostafazade M, Sadeghi H. Effects of  
449 date palm pollen (*Phoenix dactylifera* L.) and *Astragalus ovinus* on sperm parameters and sex  
450 hormones in adult male rats. *Iranian Journal of Reproductive Medicine*, 2014; 12(10): 705 –  
451 712.
- 452 36. El-Kashian AM, Nooh MM, Hassan WA, Rizk SM. Therapeutic potential of date palm pollen  
453 for testicular dysfunction induced by thyroid disorders in male rats. *PLOS ONE*, 2015; 10(10):  
454 e0139493.
- 455 37. Ismail WIW, Radzi MNFM. Evaluation on the benefits of date palm (*Phoenix dactylifera*) on  
456 the brain. *Alternative and Integrative Medicine*, 2013; 2: 1 - 3.
- 457 38. Shimon I, Lubina A, Gorfine M, Ilany J. Feedback inhibition of gonadotropins by testosterone  
458 in men with hypogonadotropic hypogonadism: comparison to the intact pituitary-testicular axis  
459 in primary hypogonadism. *Journal of Andrology*, 2013; 27(3): 358 – 364.
- 460 39. Plaseska-Karanfilska D, Noveski P, Plaseski T, Maleva I, Madjunkova S, Moneva Z. Genetic  
461 causes of male infertility. *Balkan Journal of Medical Genetics*, 2012; 15(Suppl): 31–34.

- 462 40. Venkatesh T, Suresh PS, Tsutsumi R. New insights into the genetic basis of infertility. The  
463 Application of Clinical Genetics, 2014; 7: 235 – 243.
- 464 41. Sleha R, Boštiková V, Salavec M, Mosio P, Kukla R, Mazurová J, Spleňo M. Bacterial  
465 infection as a cause of infertility in humans. Epidemiologie Mikrobiologie Imunologie,  
466 2013; 62(1): 26 – 32.
- 467 42. Ubah AS, Abalaka SE, Idoko SI, Obeta SS, Ejiofor CE, Mshelbwala PP, Omeje JN, Ajayi IE.  
468 Canine babesiosis in a male Boerboel: Hematobiochemical and anatomic T pathological  
469 changes in the cardiorespiratory and reproductive organs. Veterinary and Animal Science,  
470 2019; 7: 100049. <https://doi.org/10.1016/j.vas.2019.100049>
- 471 43. de Kretser DM. Endocrinology of male infertility. British Medical Bulletin, 1979; 35(2): 187 –  
472 192.

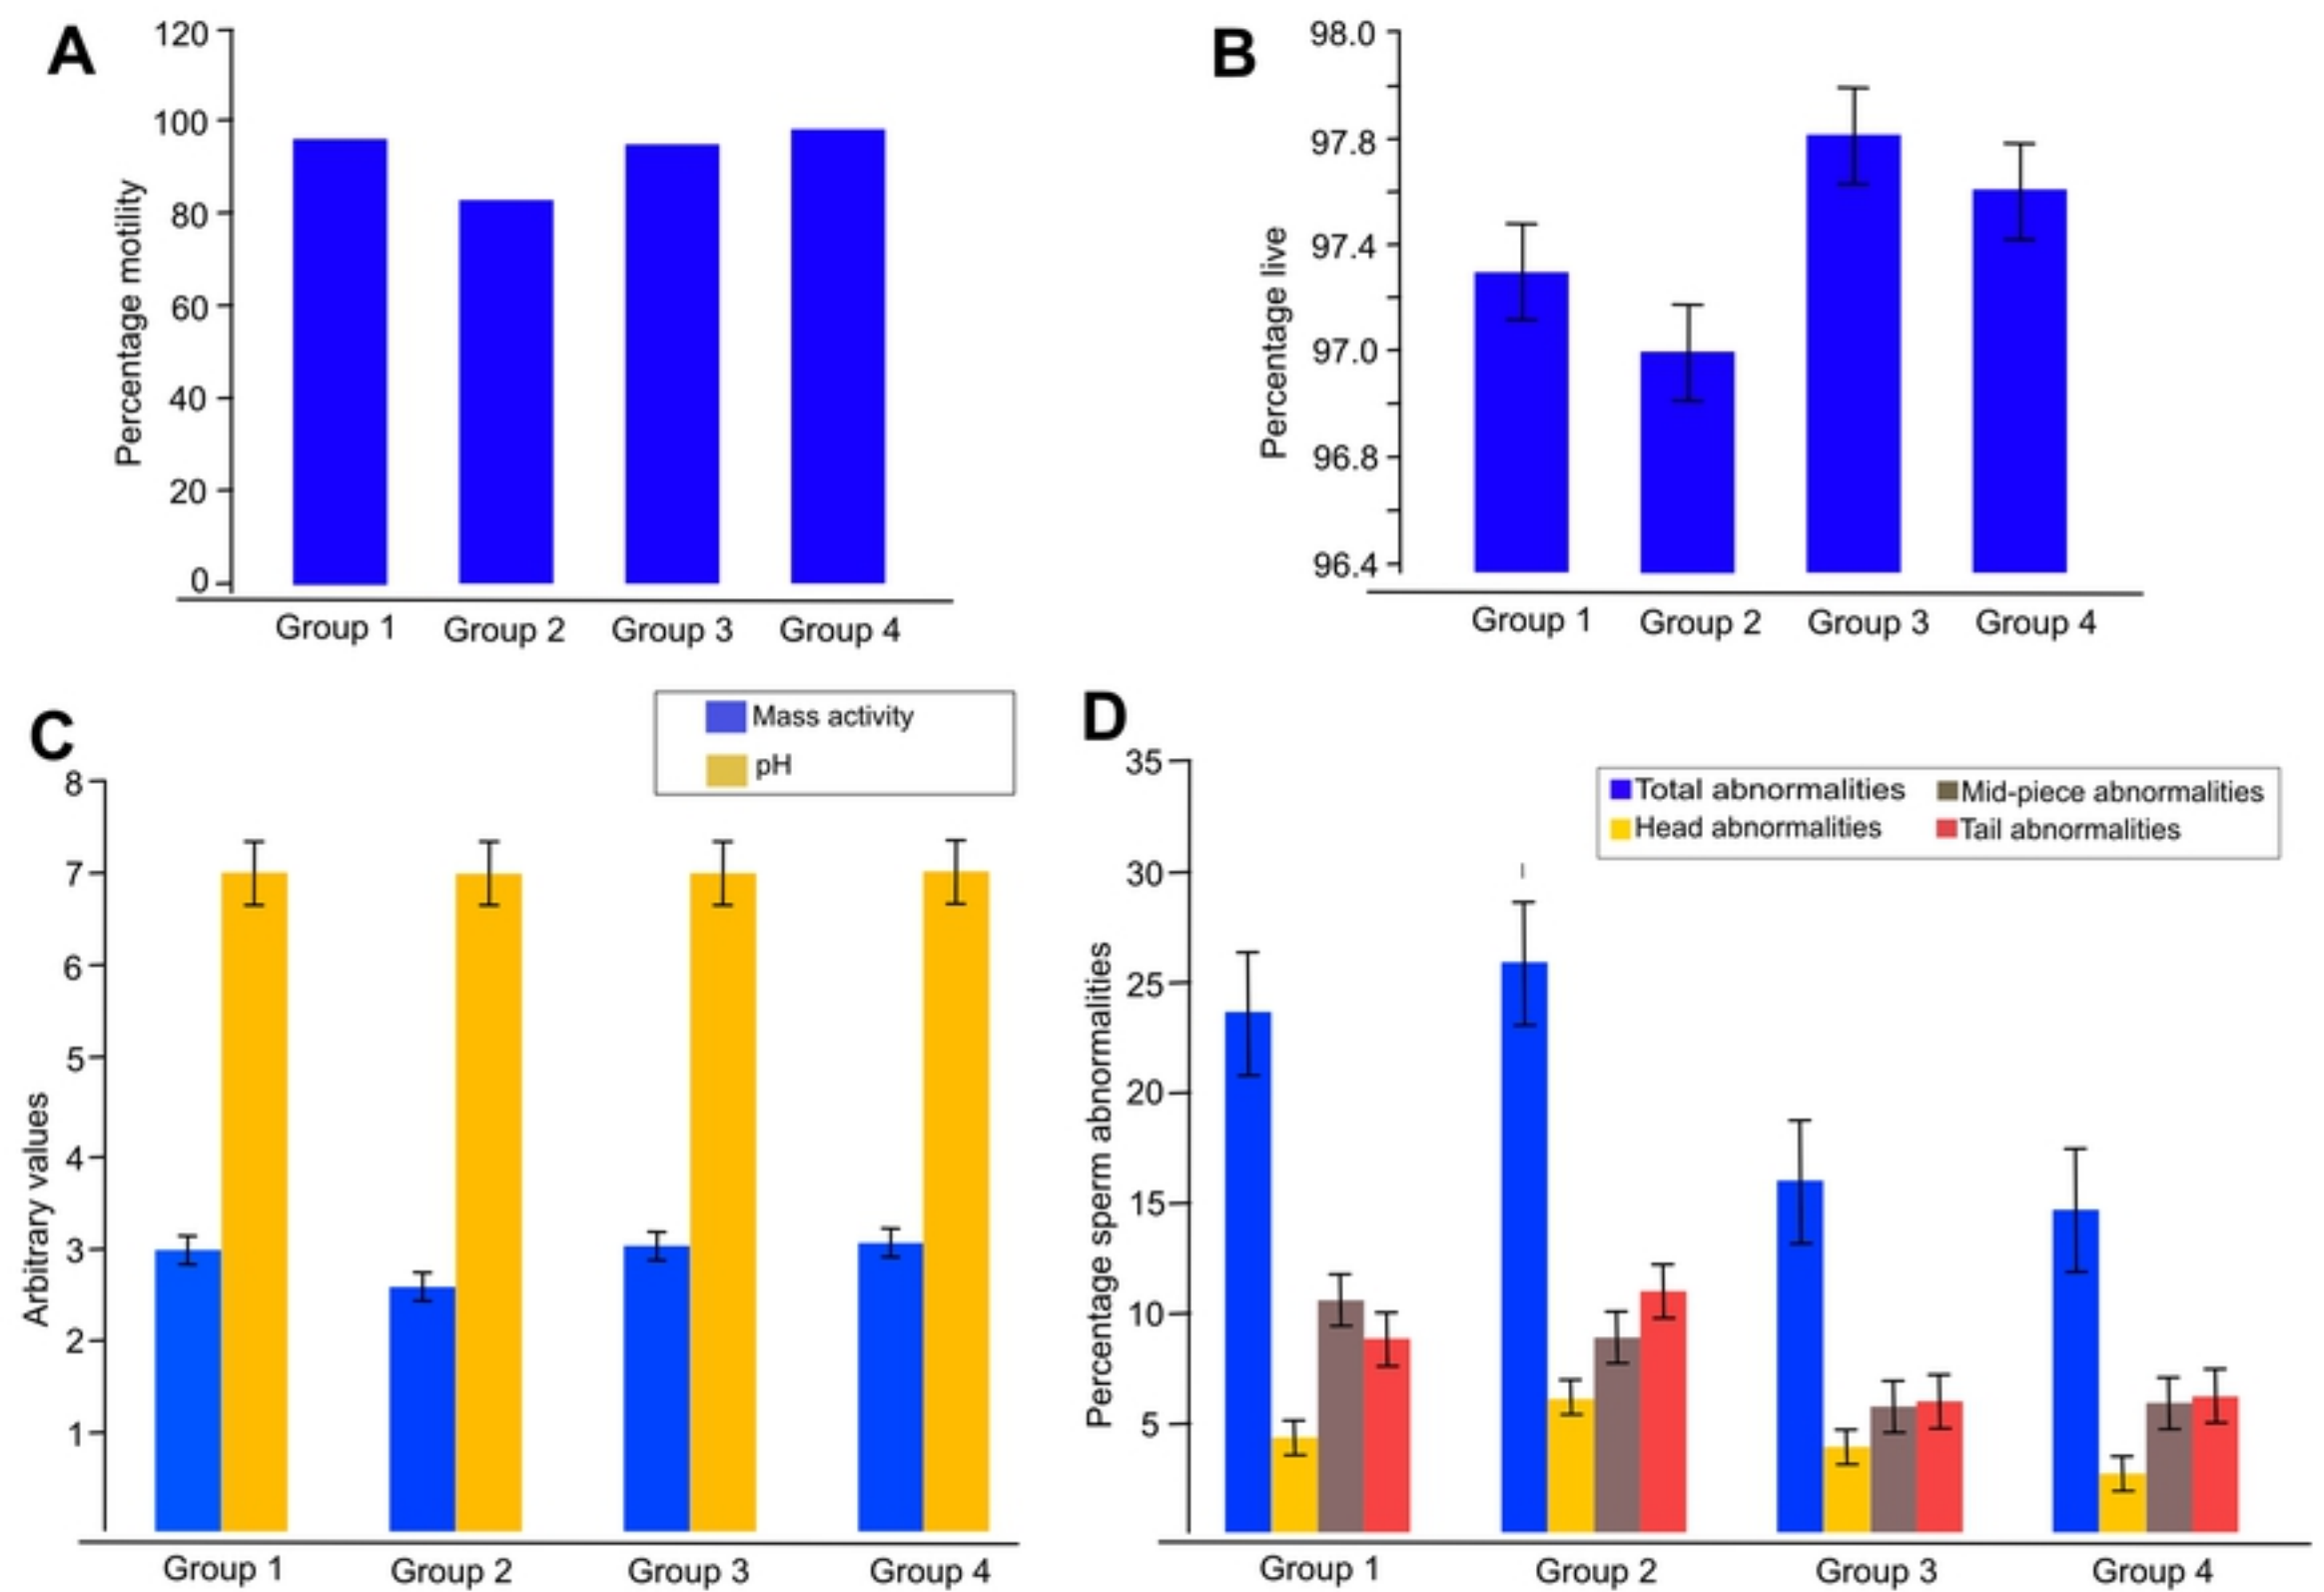

Figure 1

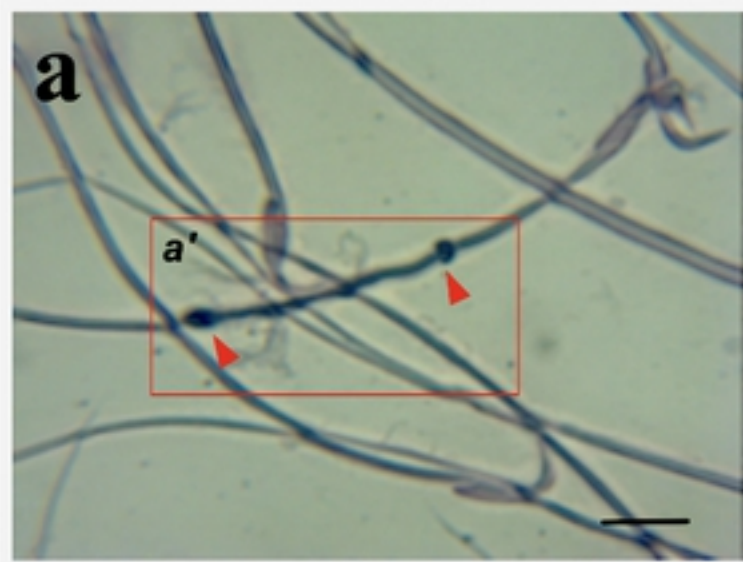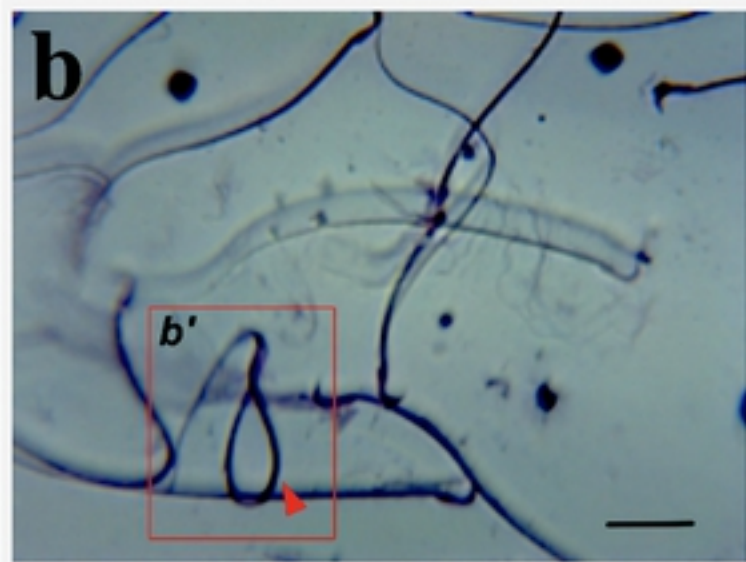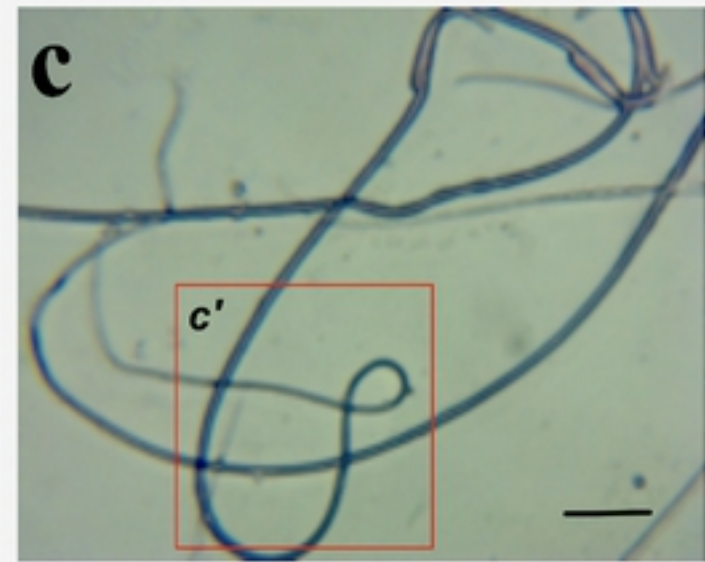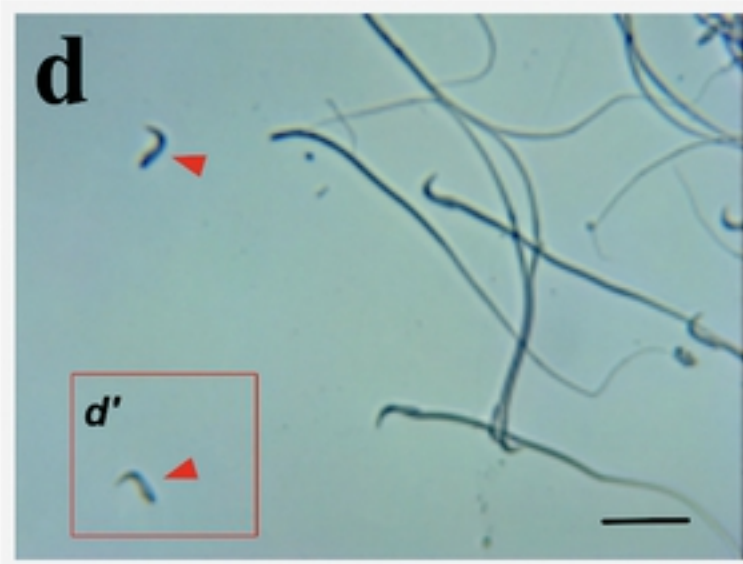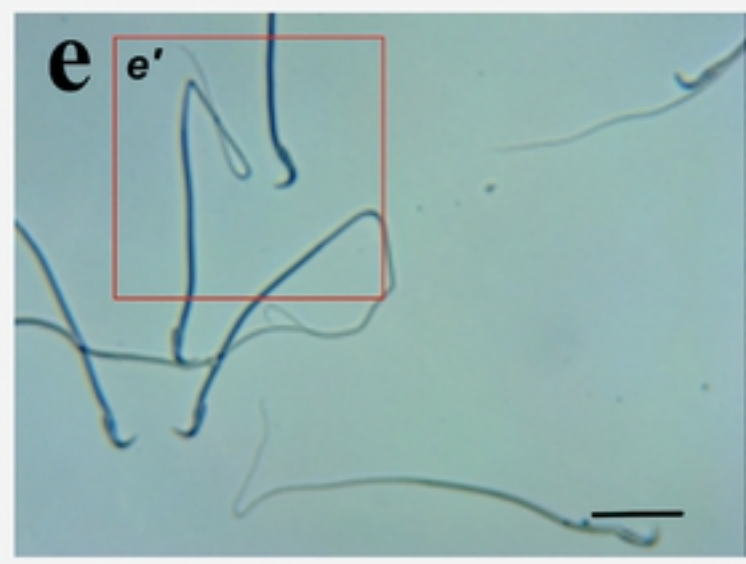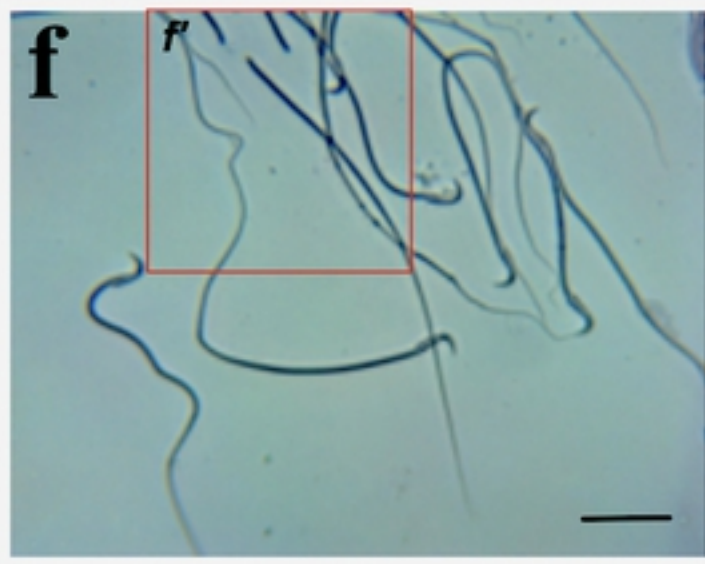

Figure 2

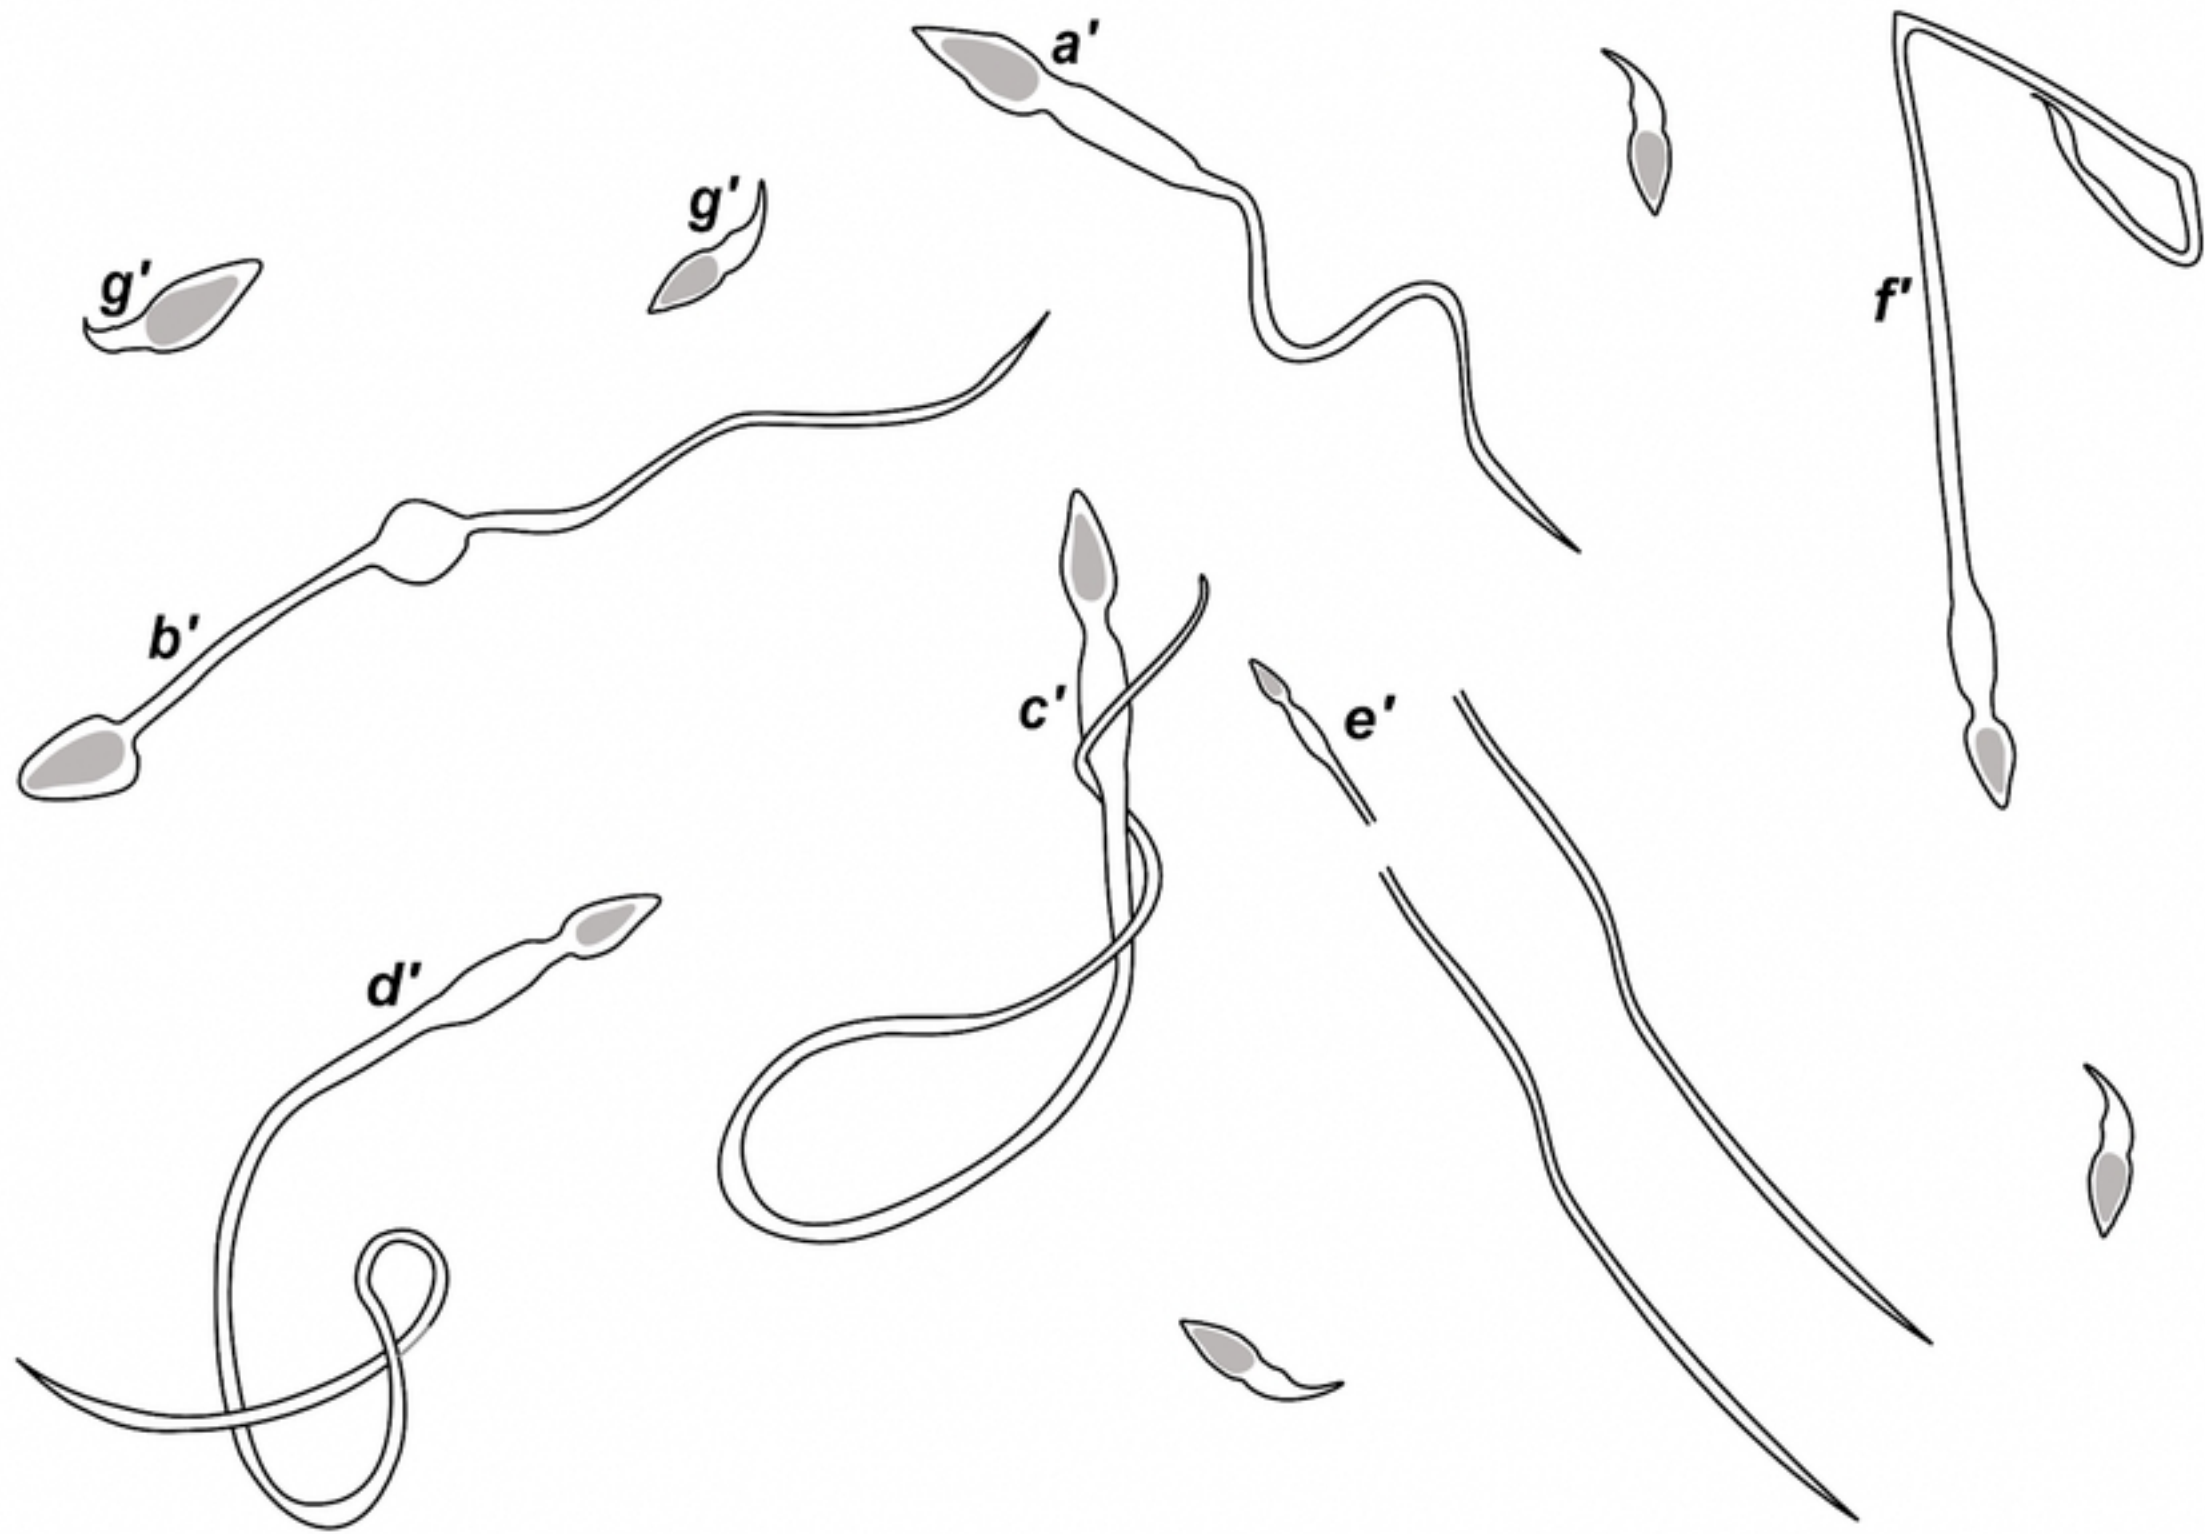

Figure 3
